# Supplementary material
Source: MDPI journal article supplement (https://www.mdpi.com/2076-3417/11/8/3332)
Supplement: s1 [file s1]

Supplementary Table.1. SOD, CAT, GST, GR, GPx activities and GSH, GSSG contents in testis of tilapia exposed to methomyl for 30 days, and after an 18-day recovery period in methomyl-free water (R18)

| Enzymes | Time (d) | Enzymes activities (% of control) |                                   |                                   |                                  |
|---------|----------|-----------------------------------|-----------------------------------|-----------------------------------|----------------------------------|
|         |          | 0.2 $\mu$ gL <sup>-1</sup>        | 2 $\mu$ gL <sup>-1</sup>          | 20 $\mu$ gL <sup>-1</sup>         | 200 $\mu$ gL <sup>-1</sup>       |
| SOD     | 30       | 97.53 $\pm$ 6.21 <sup>Ac</sup>    | 135.27 $\pm$ 5.32 <sup>Ab*</sup>  | 149.85 $\pm$ 4.88 <sup>Aa*</sup>  | 71.22 $\pm$ 4.57 <sup>Bd*</sup>  |
|         | R18      | 99.87 $\pm$ 6.32 <sup>Aa</sup>    | 102.28 $\pm$ 5.41 <sup>Ba</sup>   | 98.87 $\pm$ 5.08 <sup>Ba</sup>    | 82.43 $\pm$ 5.11 <sup>Ab*</sup>  |
| CAT     | 30       | 101.87 $\pm$ 5.87 <sup>Ac</sup>   | 161.23 $\pm$ 7.85 <sup>Aa*</sup>  | 118.21 $\pm$ 6.79 <sup>Ab*</sup>  | 68.12 $\pm$ 6.52 <sup>Ad*</sup>  |
|         | R18      | 98.67 $\pm$ 8.48 <sup>Aa</sup>    | 105.32 $\pm$ 6.97 <sup>Ba</sup>   | 96.88 $\pm$ 7.86 <sup>Ba</sup>    | 79.86 $\pm$ 6.88 <sup>Ab*</sup>  |
| GST     | 30       | 103.11 $\pm$ 5.03 <sup>Ab</sup>   | 117.86 $\pm$ 4.85 <sup>Aa*</sup>  | 120.59 $\pm$ 5.39 <sup>Aa*</sup>  | 74.11 $\pm$ 6.25 <sup>Ac*</sup>  |
|         | R18      | 98.76 $\pm$ 5.89 <sup>Aa</sup>    | 101.12 $\pm$ 4.95 <sup>Ba</sup>   | 102.25 $\pm$ 5.02 <sup>Ba</sup>   | 66.37 $\pm$ 6.07 <sup>Ab*</sup>  |
| GR      | 30       | 98.76 $\pm$ 6.02 <sup>Ab</sup>    | 129.87 $\pm$ 7.24 <sup>Aa*</sup>  | 138.75 $\pm$ 5.86 <sup>Aa*</sup>  | 76.55 $\pm$ 7.05 <sup>Ac*</sup>  |
|         | R18      | 100.53 $\pm$ 7.09 <sup>Aa</sup>   | 101.88 $\pm$ 6.45 <sup>Ba</sup>   | 99.45 $\pm$ 6.03 <sup>Ba</sup>    | 83.56 $\pm$ 5.23 <sup>Ab*</sup>  |
| GPx     | 30       | 102.11 $\pm$ 7.21 <sup>Ad</sup>   | 135.85 $\pm$ 6.35 <sup>Abc*</sup> | 147.33 $\pm$ 6.02 <sup>Aab*</sup> | 159.35 $\pm$ 7.06 <sup>Aa*</sup> |
|         | R18      | 97.56 $\pm$ 7.52 <sup>Ab</sup>    | 102.36 $\pm$ 7.05 <sup>Bb</sup>   | 102.75 $\pm$ 6.35 <sup>Cb</sup>   | 122.54 $\pm$ 5.88 <sup>Ba*</sup> |
| GSH     | 30       | 101.22 $\pm$ 6.35 <sup>Aa</sup>   | 91.23 $\pm$ 6.45 <sup>Aab</sup>   | 79.88 $\pm$ 5.32 <sup>Bbc*</sup>  | 63.95 $\pm$ 5.88 <sup>Bd*</sup>  |
|         | R18      | 96.88 $\pm$ 5.36 <sup>Aa</sup>    | 101.22 $\pm$ 5.02 <sup>Aa</sup>   | 103.25 $\pm$ 5.45 <sup>Aa</sup>   | 84.55 $\pm$ 5.21 <sup>Ab*</sup>  |
| GSSG    | 30       | 102.88 $\pm$ 5.23 <sup>Ad</sup>   | 117.23 $\pm$ 6.02 <sup>Abc*</sup> | 128.56 $\pm$ 6.12 <sup>Aab*</sup> | 137.69 $\pm$ 5.06 <sup>Aa*</sup> |
|         | R18      | 98.56 $\pm$ 6.02 <sup>Ab</sup>    | 103.87 $\pm$ 5.33 <sup>Bb</sup>   | 98.21 $\pm$ 5.43 <sup>Bb</sup>    | 119.88 $\pm$ 6.05 <sup>Ba*</sup> |

Note: All the data were expressed as Average  $\pm$  SD (n=6). “\*” means significant difference from the control. Different lower-case letters indicate significant difference among concentrations at the same exposure period, and different upper-case letters indicate difference between exposure and recovery periods at the same methomyl concentration, and with  $P < 0.05$  being considered significant.
